# Supplementary material for: Synergistically modifying electron transport layers and bottom buried perovskite layers of perovskite solar cells
Source: Royal Society of Chemistry journal article supplement (doi:10.1039/d3tc03245k), 2023-01-01
Supplement: d3tc03245k1.pdf [file d3tc03245k1.pdf]

## ***Supporting Information***

### **Synergistically modifying electron transport layers and bottom buried perovskite layers of perovskite solar cells**

Xiangheng Liu<sup>a</sup>, Zhengyan He<sup>a</sup>, Honglei Yu<sup>a</sup>, Shufang Zhang<sup>a,\*</sup>, Changlin Yao<sup>a</sup>, Qi Zhang<sup>a</sup>, Ping Chen<sup>b,\*</sup>

<sup>a</sup>School of Physics and Photoelectronic Engineering, Ludong University, Yantai 264025, P. R. China.

<sup>b</sup>Furong College, Hunan University of Arts and Science, Changde 415000, P. R. China.

#### **\*Corresponding Author**

E-mail: zhang.shufang@ldu.edu.cn (S.F. Zhang); chenping8315@126.com

## Experimental Section

### Materials

Lead iodide ( $\text{PbI}_2$ , 99.99%), Methylamine iodide (MAI, 99.5%), Methylamine chloride (MACl, 99.5%) and Formamidinium iodide (FAI, 99.9%) were purchased from Xi'an Polymer Light Technology Corp, 3-O-Ethyl-L-ascorbic acid (ELAA, 99.5%) was purchased from TCI, Isopropanol (IPA, 99.5%), N, N-dimethylformamide (DMF, 99.5%), ethyl acetate (EA, 99.0%) and dimethyl sulfoxide (DMSO, 99.5%) were purchased from Aladdin.  $\text{SnO}_2$  colloidal dispersion (diluted 15% in  $\text{H}_2\text{O}$ ) was purchased from Advanced Election Technology CO.,Ltd. Unless otherwise specified, all powders and solutions are used directly without further purification.

### Device fabrication

Firstly, ultrapure water, acetone, and ethanol are used to clean FTO substrate in an ultrasonic cleaner for 30 minutes in turn and then put into a UV cleaning box for the mixed treatment of UV and  $\text{O}_3$  for about 30 min. For the  $\text{SnO}_2$  electron transport layer, firstly, the used solution was prepared from  $\text{SnO}_2$  nanocrystal solution (diluted to 5.5% with  $\text{H}_2\text{O}$ ), then spin-coated on the FTO substrate for 35 s at 4,500 rpm/s, and finally heated at 155 °C in an air environment annealed for 25 minutes. For the  $\text{SnO}_2$  film modified by ELAA, firstly, different concentrations of ELAA powder were dissolved in IPA, then dripped on the fresh  $\text{SnO}_2$  film cooled to room temperature, spin-coated at the speed of 4000 rpm/s for 30 s, and then heated on a hot plate for 5min. For the preparation of perovskite thin films, 0.23 g FAI, 0.65 g  $\text{PbI}_2$ , 0.045 g MAI and 0.03g MACl were mixed in 1 mL DMSO and DMF mixed solvent (6:1, v/v), and the  $\text{FA}_x\text{MA}_{1-x}$ .

$x\text{PbI}_3$  perovskite precursor solution with a concentration of 1.3 M was prepared, which was then put into a stirrer and stirred at 60 °C for 6 hours until it was completely dissolved. The perovskite precursor solution was dropped onto the  $\text{SnO}_2$  substrate or  $\text{SnO}_2/\text{ELAA}$  substrate and spin-coated at 4000 rpm/s for 40 s. The anti-solvent was added dropwise during spin coating by adding 200  $\mu\text{L}$  of EA dropwise after spinning for 15 seconds. Then, the perovskite films were annealed in a nitrogen atmosphere for 15 minutes with a hot plate temperature of 150 °C. The hole transporter, dissolving the hole transport material spiro-OMeTAD in a mixed solution of tert-butylpyridine (TBP) and chlorobenzene (0.22 g spiro-OMeTAD in 0.046 g TBP and 1.06 mL chlorobenzene), and the additive bistrifluoromethanesulfonimide lithium salt (LiTFSI) was added, the solution was then spin-coated on the device surface for 40 s at 4000 rpm/s. Finally, the top electrode was covered with a mask, and 80 nm thick Ag electrodes were deposited by thermal evaporation deposition coating equipment.

## **Characterization**

*Characterization of large instruments:* FTIR spectra were measured by IRTracer-100 (Shimadzu, Japan). The ultraviolet-visible spectrum of the sample was recorded by ultraviolet-visible-near infrared spectrophotometer (UV-3600i, Shimadzu). Surface morphologies of perovskite thin films were observed by atomic force microscopy (Bruker AFM Multimode 8) and scanning electron microscopy (FEI NOVA NanoSEM 450). The XRD of the samples was measured on an Empyrean X-ray diffractometer (PANalytical B.V. Co., Netherlands) with Cu K $\alpha$  radiation. The steady-state PL spectra of the samples were measured using Steady State & Transient State Fluorescence Spectrofluorometer FluroMax-4P with an excitation light source wavelength of 405 nm. TRPL measurements were performed by Time-Resolved Fluorescence Spectrofluorometer TemPro-01 with an excitation light source wavelength of 478 nm. X-

ray photoelectron spectroscopy (XPS) Measurement of samples by K-alpha (Thermo Scientific, USA). The linear scanning current-voltage curve of PSC was measured with Keithley 2400 digital source meter under the standard sunlight simulator (100 mw cm<sup>-2</sup>, Solar Simulator 94023A, Newport). Photo stability was tested under a solar simulator (XES-40S1, SAN-EI ELECTRIC) equipped with a 150 W Xe lamp. For stability, unencapsulated perovskite films and devices were placed in an air environment at 25 °C and 40 ± 5% relative humidity (RH) for long-term monitoring.

*Theoretical calculations:* Density functional theory (DFT) calculations were performed using the Gaussian 16 Revision A.03 suite of programs, and geometry optimization was performed at the B3LYP/6-31G(d) theoretical level. <sup>[1,2]</sup>

## Figures and Tables

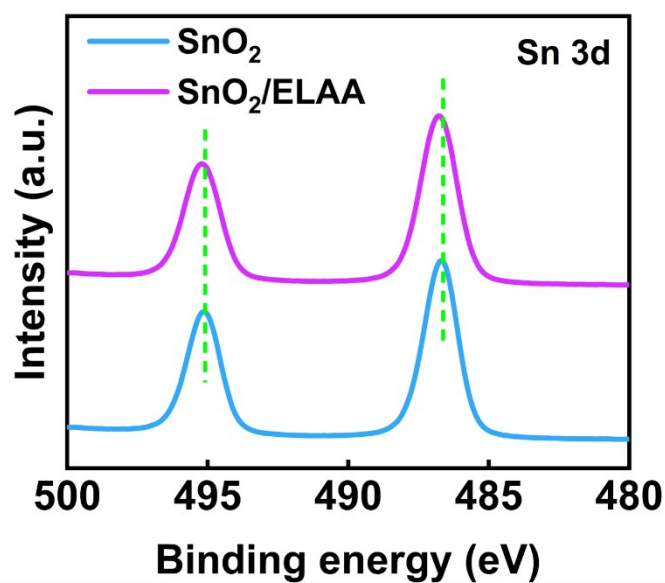

**Fig. S1** XPS spectra of Sn 3d core levels of the unmodified SnO<sub>2</sub> and ELAA-modified SnO<sub>2</sub>.

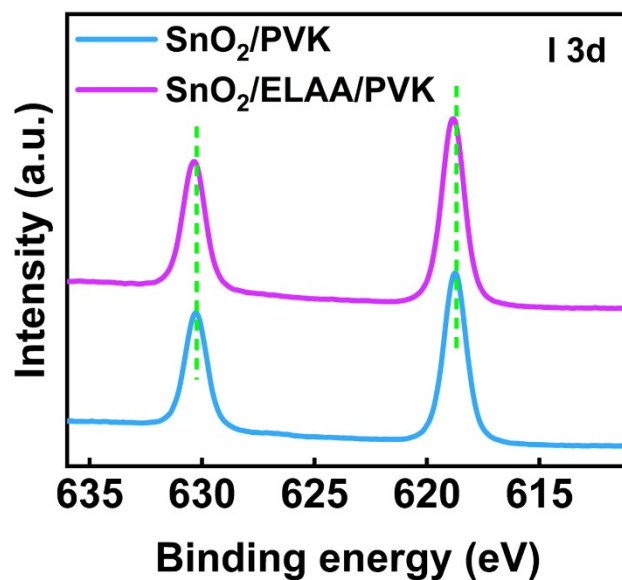

**Fig. S2** XPS spectrum of core energy level of PVK I 3d deposited based on unmodified SnO<sub>2</sub> and ELAA modified SnO<sub>2</sub>.

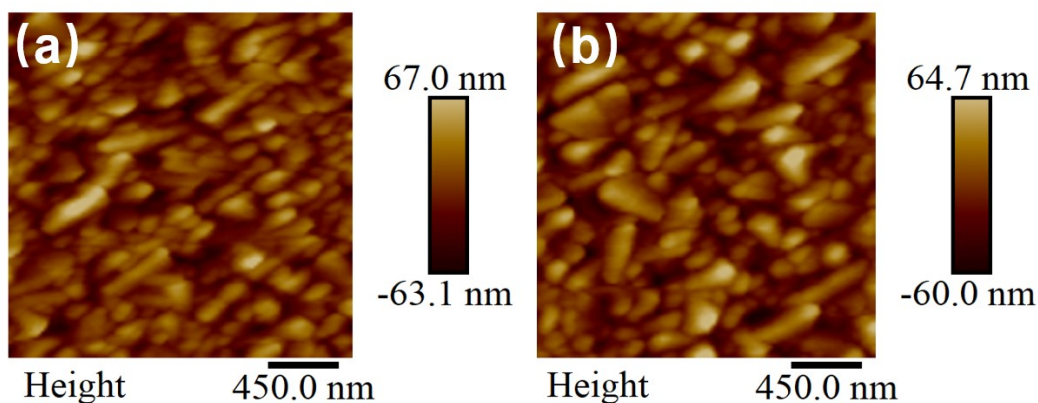

**Fig. S3** AFM images of (a) unmodified and (b) ELAA modified SnO<sub>2</sub> films.

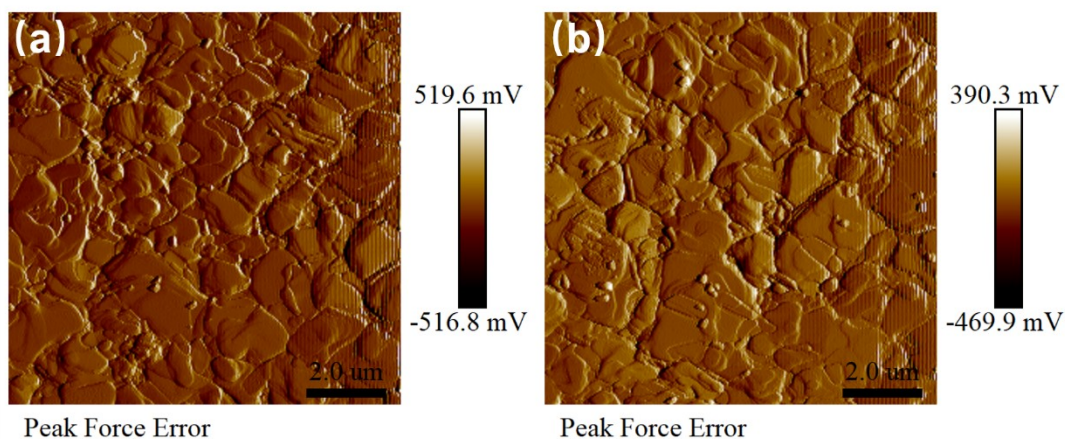

**Fig. S4** AFM Peak force error mode image of PVK deposited based on (a) unmodified SnO<sub>2</sub> and (b) ELAA modified SnO<sub>2</sub>.

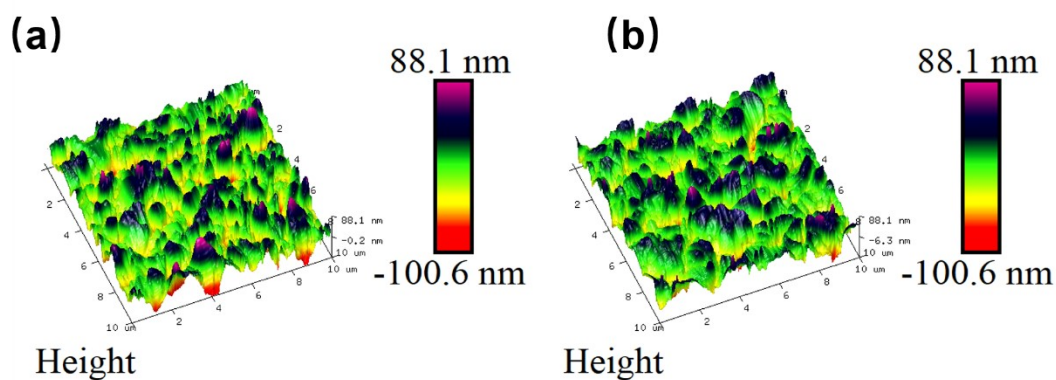

**Fig. S5** 3D AFM image of PVK deposited based on (a) unmodified SnO<sub>2</sub> and (b) ELAA modified SnO<sub>2</sub>.

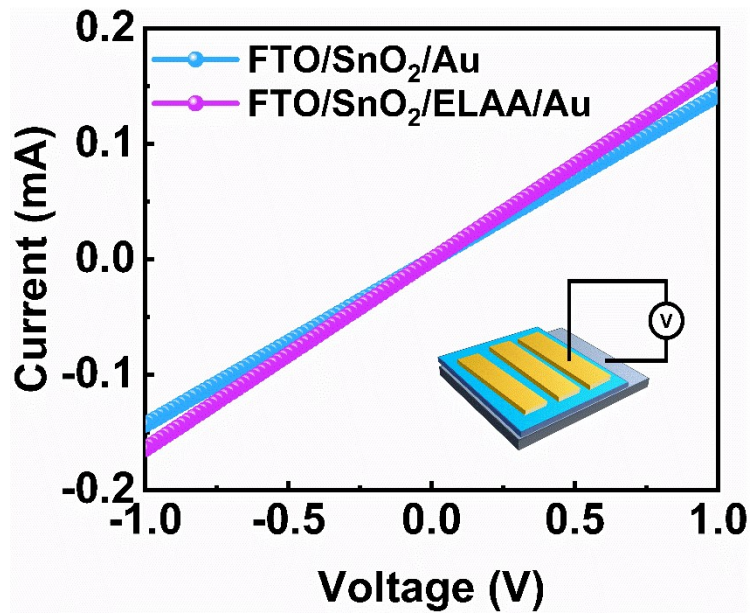

Fig. S6 Vertical conductivity of different cell structures without/with ELAA optimization.

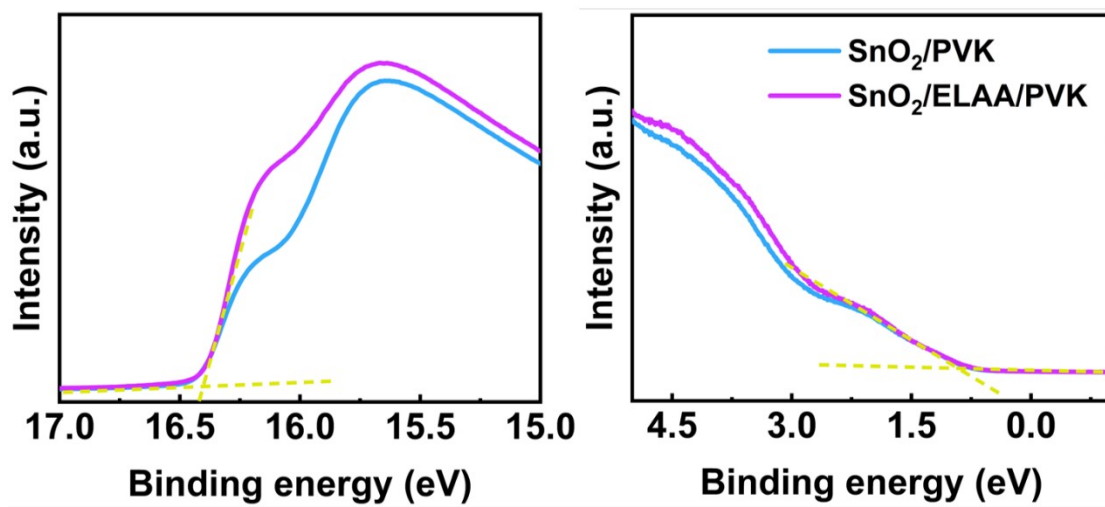

Fig. S7 (a) UPS of PVK based on SnO<sub>2</sub> of without/with ELAA modification.

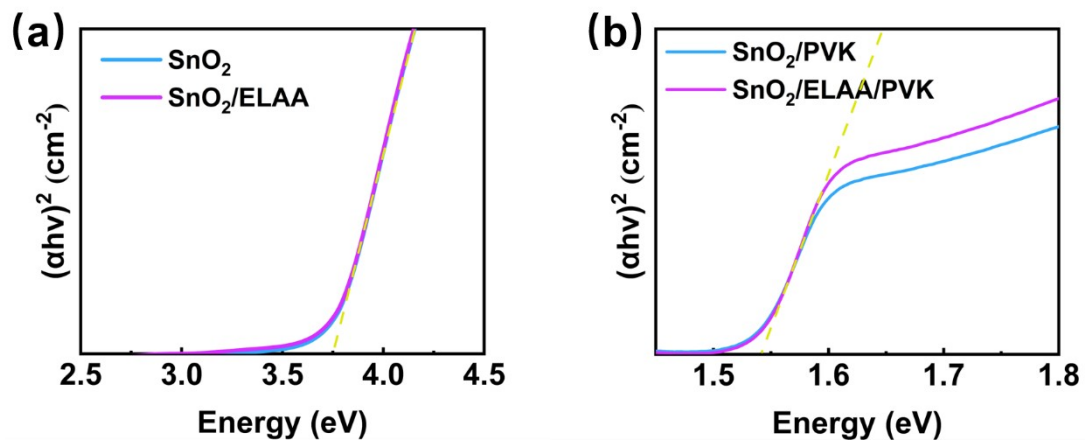

**Fig. S8** Optical band gap Tauc spectra of (a)  $\text{SnO}_2$  films without and with ELAA modification, (b) PVK films deposited based on unmodified  $\text{SnO}_2$  and ELAA modified  $\text{SnO}_2$ .

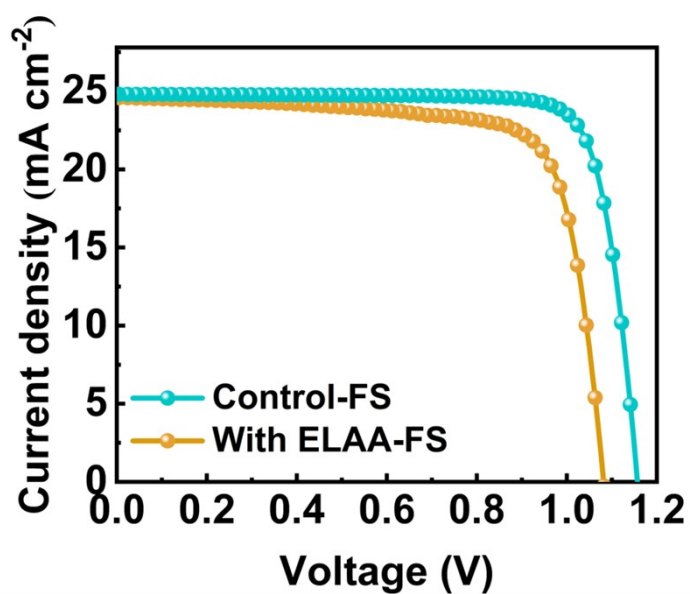

**Fig. S9** Forward scanning (FS)  $J-V$  curve of the best small PSCs without/with 5mM ELAA optimization.



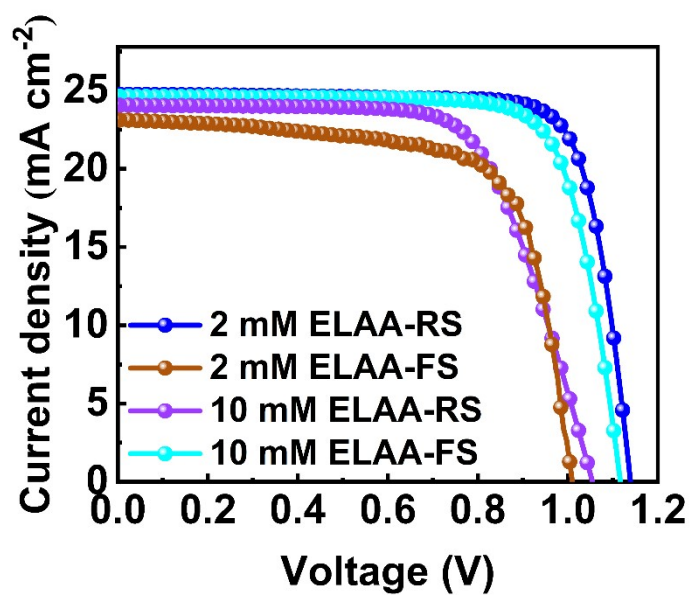

**Fig. S10** J-V curves of the best small PSCs with other ELAA concentrations.

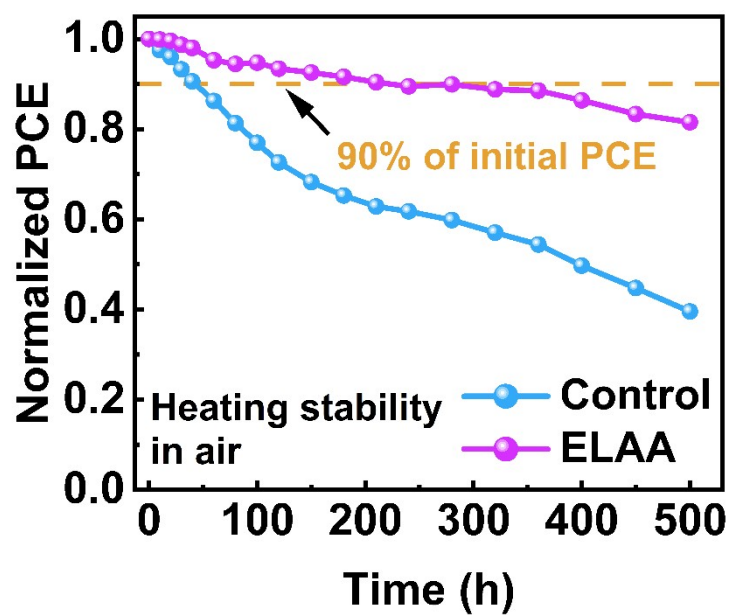

**Fig. S11** Monitor the heating stability of PSCs without/with ELAA modification in air environment. The air environment conditions are 25°C and 40±5% RH.

**Table S1** TRPL parameters of PVK thin films based on different structures.

| Name                       | A <sub>1</sub> | τ <sub>1</sub> [ns] | A <sub>2</sub> | τ <sub>2</sub> [ns] | τ <sub>ave</sub> [ns] <sup>b)</sup> |
|----------------------------|----------------|---------------------|----------------|---------------------|-------------------------------------|
| SnO <sub>2</sub> /PVK      | 0.8372         | 7.52097             | 0.59043        | 220.18542           | 95.47336                            |
| SnO <sub>2</sub> /ELAA/PVK | 0.819          | 2.56156             | 0.57989        | 70.62028            | 30.77434                            |
| Glass/PVK                  | 0.87214        | 62.8747             | 0.52872        | 1810.70754          | 722.55103                           |
| Glass/ELAA/PVK             | 0.95148        | 83.62355            | 0.56959        | 2080.8657           | 831.52414                           |

b)  $\tau_{ave} = \frac{A_1\tau_1 + A_2\tau_2}{A_1 + A_2}$

**Table S2** EIS Parametric statistics based on unmodified and ELAA modified devices.

| Name                       | R <sub>ct</sub>        | R <sub>rec</sub> |
|----------------------------|------------------------|------------------|
| SnO <sub>2</sub> /PVK      | 4.29E+04 <sup>c)</sup> | 2.14E+05         |
| SnO <sub>2</sub> /ELAA/PVK | 3.69E+04               | 5.26E+05         |

c) E+01: × 10<sup>1</sup>

**Table S3** Statistics of performance parameters of cells with different optimal concentrations of ELAA under the effective area of 0.09 cm<sup>2</sup>.

| concentration of ELAA [mM] | Scan direction | J <sub>sc</sub> [mA cm <sup>-2</sup> ] | V <sub>oc</sub> [V] | FF [%] | PCE [%] | HI [%] <sup>a)</sup> |
|----------------------------|----------------|----------------------------------------|---------------------|--------|---------|----------------------|
| 0                          | Reverse        | 24.64                                  | 1.12                | 75.91  | 20.95   | 7.39                 |
|                            | Forward        | 24.51                                  | 1.08                | 74.57  | 19.40   |                      |
| 2                          | Reverse        | 24.77                                  | 1.14                | 78.85  | 22.27   | 5.76                 |
|                            | Forward        | 24.62                                  | 1.12                | 76.28  | 20.98   |                      |
| 5                          | Reverse        | 24.88                                  | 1.17                | 80.49  | 23.43   | 2.57                 |
|                            | Forward        | 24.79                                  | 1.16                | 79.32  | 22.83   |                      |
| 10                         | Reverse        | 24.05                                  | 1.05                | 71.19  | 17.98   | 11.93                |
|                            | Forward        | 23.18                                  | 1.01                | 67.62  | 15.83   |                      |

a)  $HI = (PCE_{Rev} - PCE_{For}) \times 100 / PCE_{Rev}$

**Table S4** Statistics of performance parameters of cells without/with optimal concentrations of ELAA under the effective area of 1.01 cm<sup>2</sup>.

| Name                       | J <sub>sc</sub> [mA cm <sup>-2</sup> ] | V <sub>oc</sub> [V] | FF [%] | PCE [%] |
|----------------------------|----------------------------------------|---------------------|--------|---------|
| SnO <sub>2</sub> /PVK      | 23.82                                  | 1.05                | 73.23  | 18.32   |
| SnO <sub>2</sub> /ELAA/PVK | 24.01                                  | 1.11                | 77.46  | 20.64   |

## References

- [1] J.B. Foresman, Æ. Frisch, Exploring Chemistry, Gaussian Inc., Pittsburg, USA, 1996.
- [2] M. Frisch, GAUSSIAN16. Revision A. 03, Gaussian Inc., Wallingford, CT, USA, 2016.
